# Supplementary material for: Deletion of mouse Setd4 promotes the recovery of hematopoietic failure
Source: bioRxiv or medRxiv preprint supplement (doi:10.1101/860239), 2019-11-29

Fig. 1

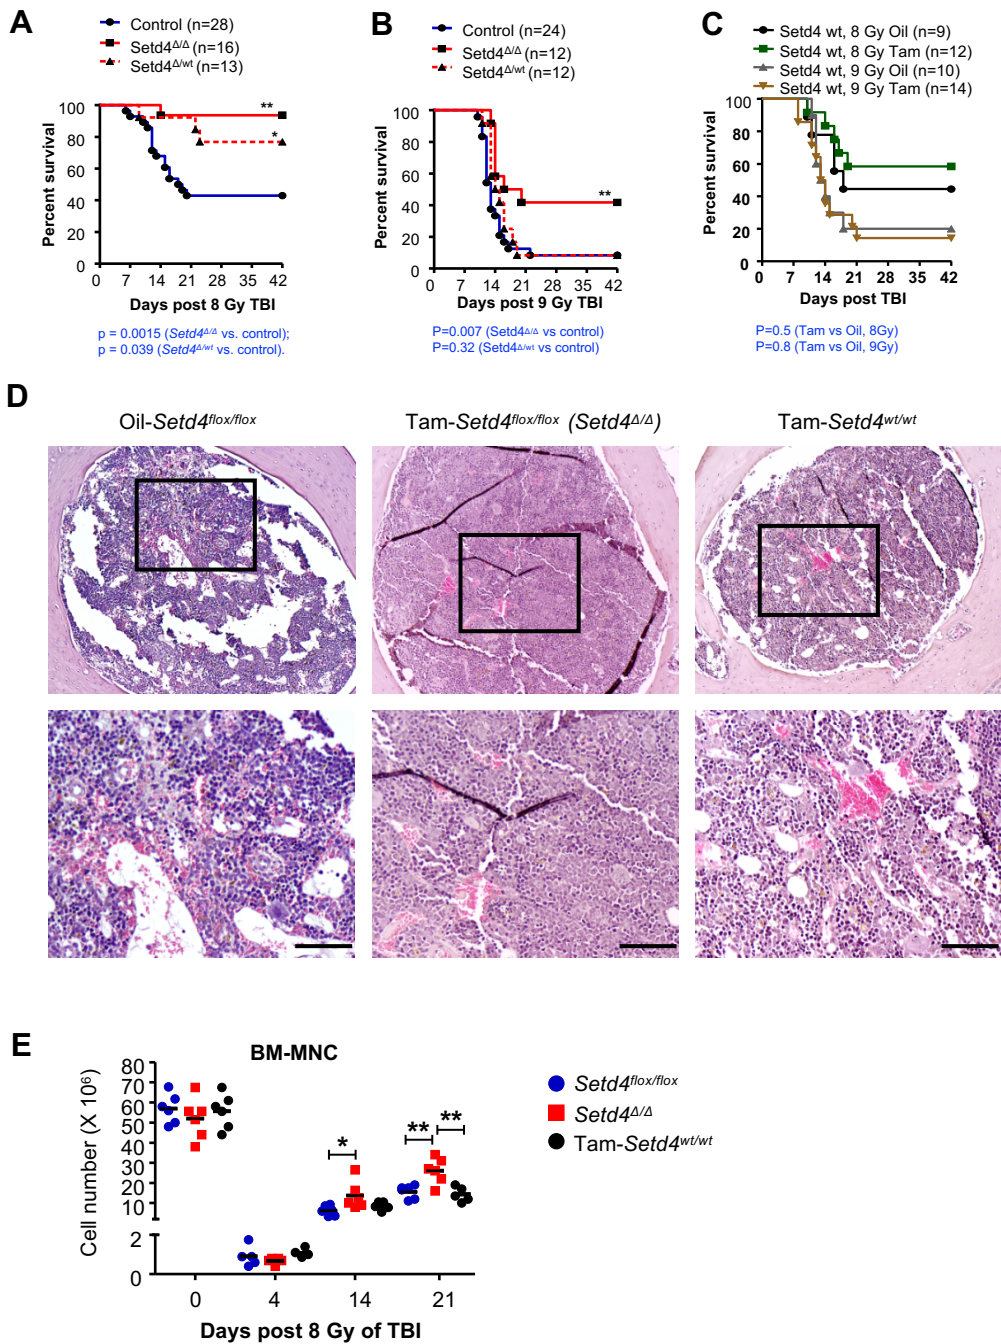

Figure 2

A

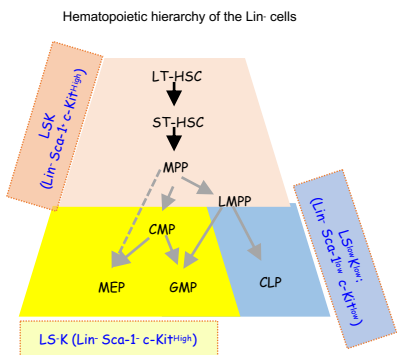

B

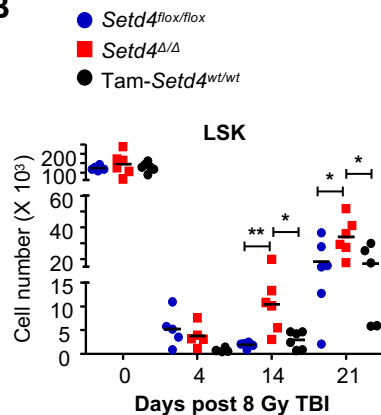

C

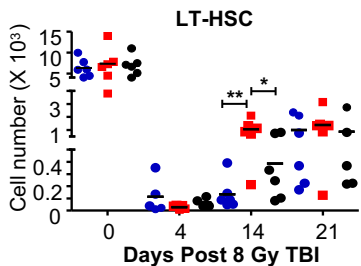

D

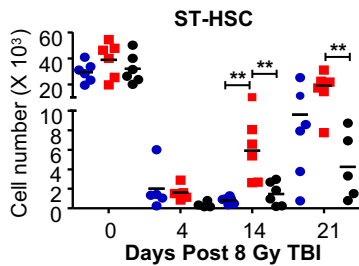

E

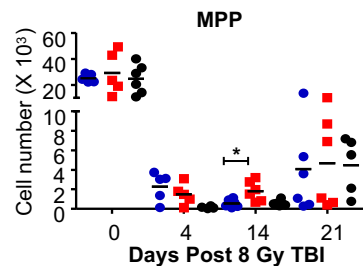

F

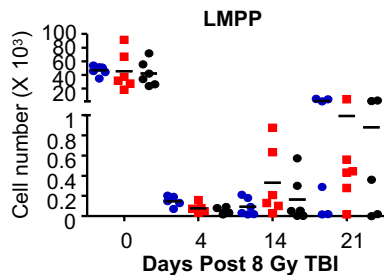

G

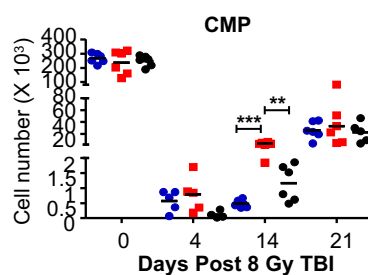

H

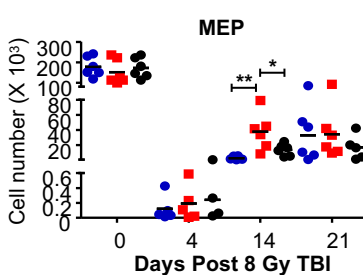

I

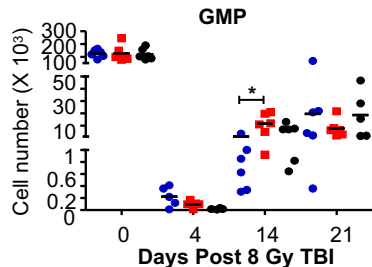

J

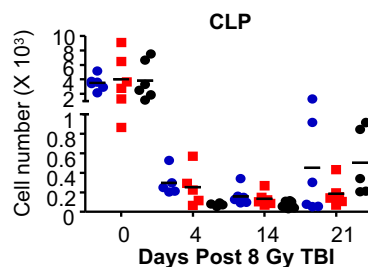

Figure 3

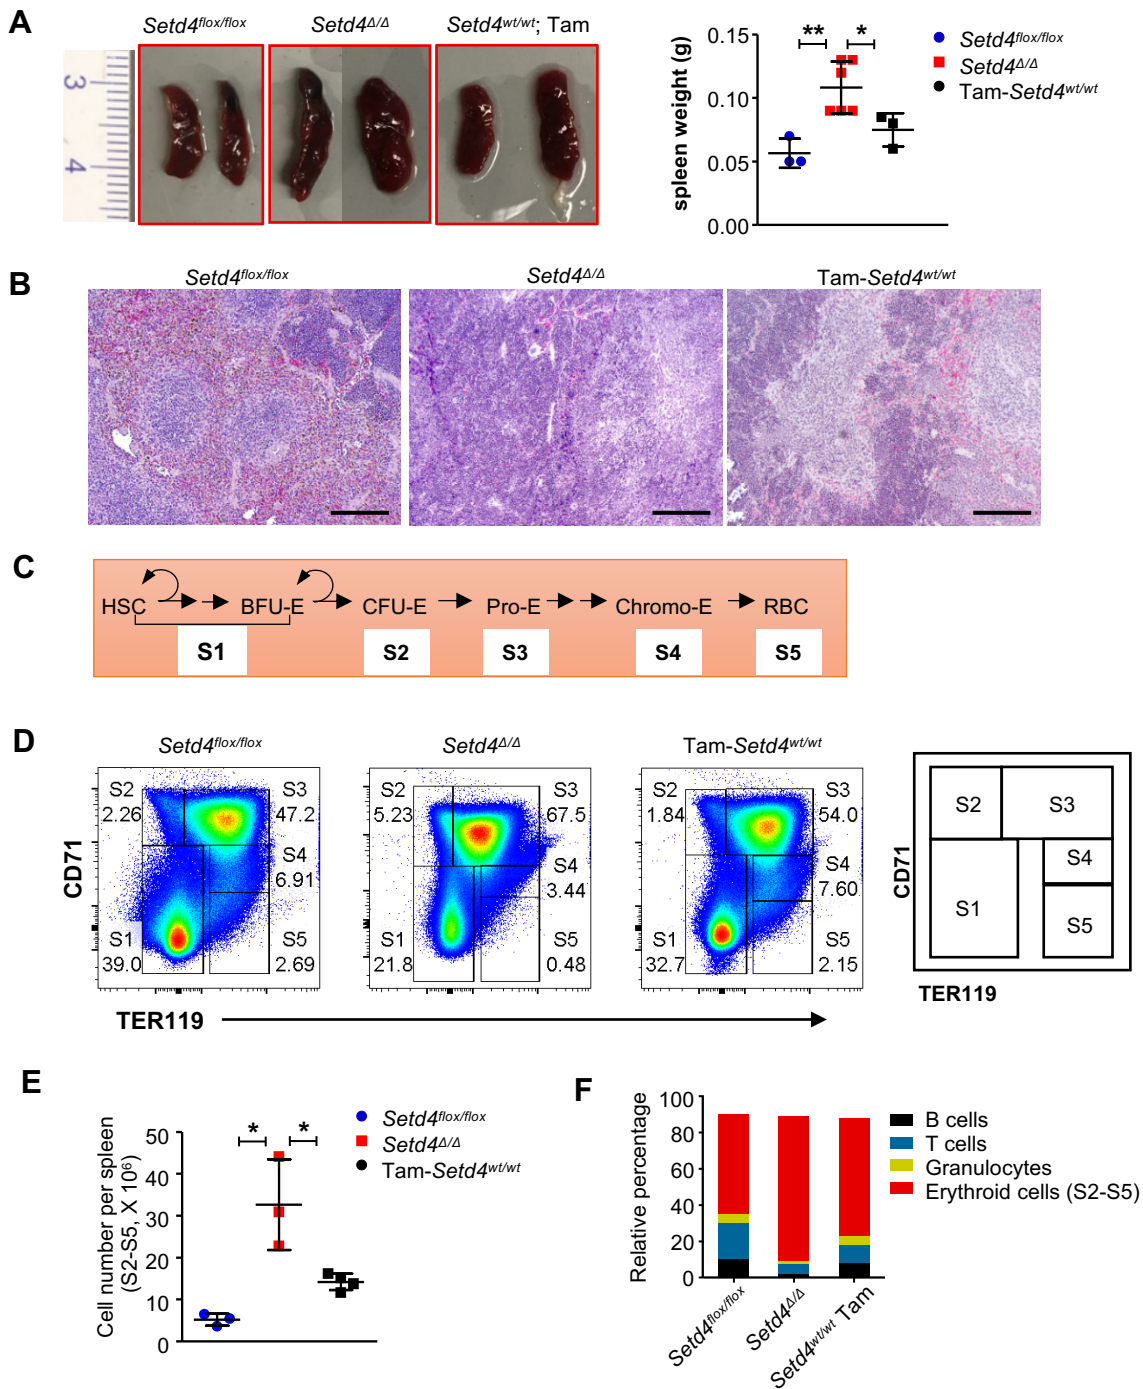

Figure 4

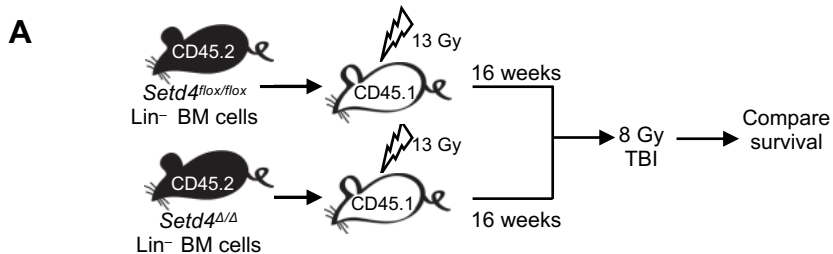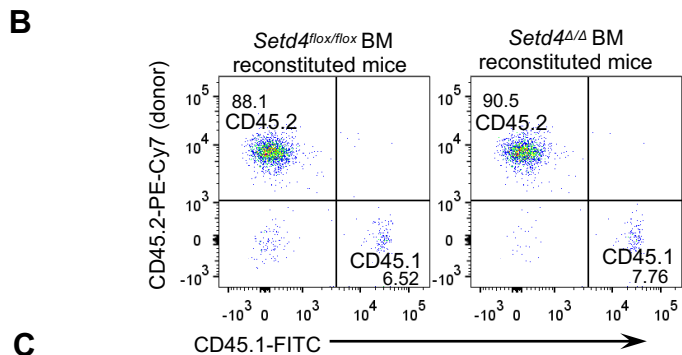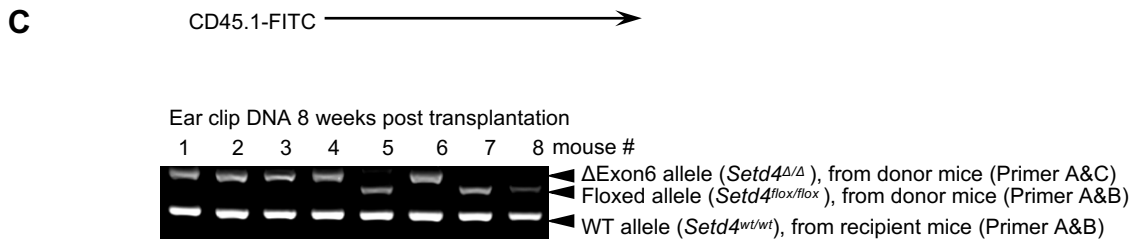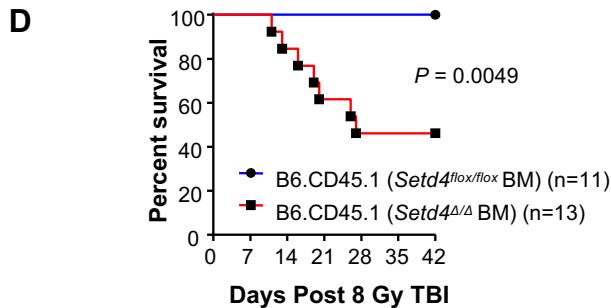

# Figure 5

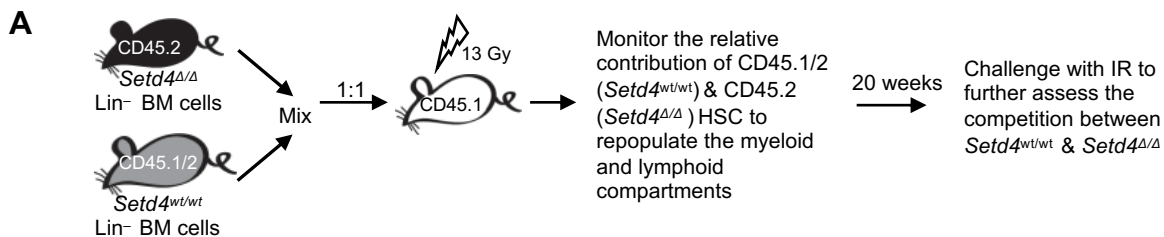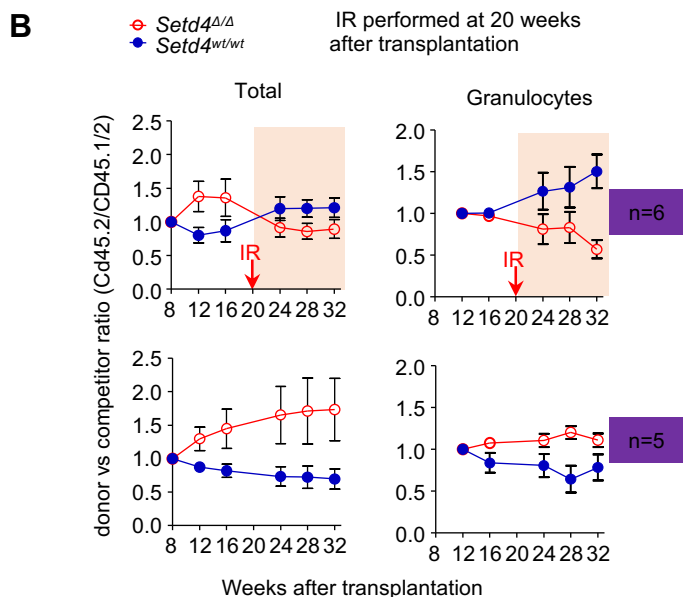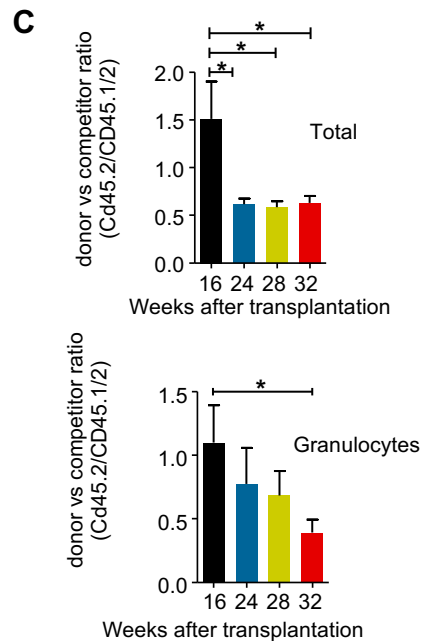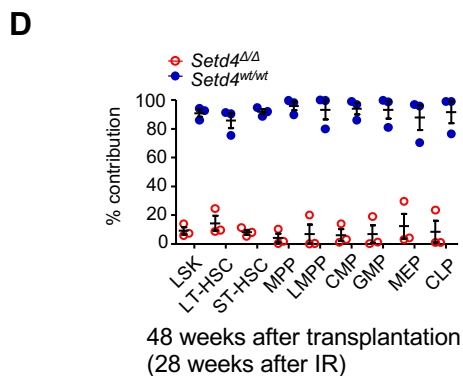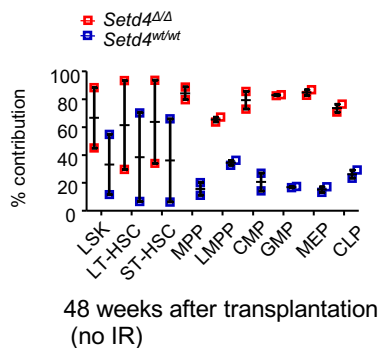

Figure 6

**A**

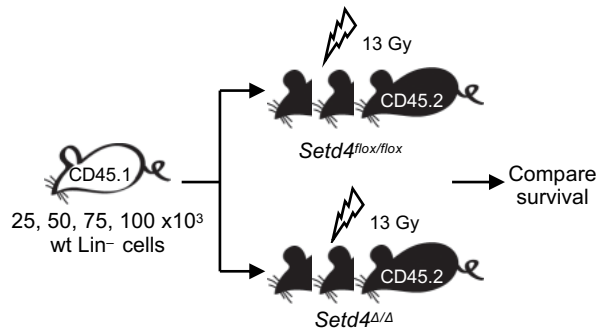

**B**

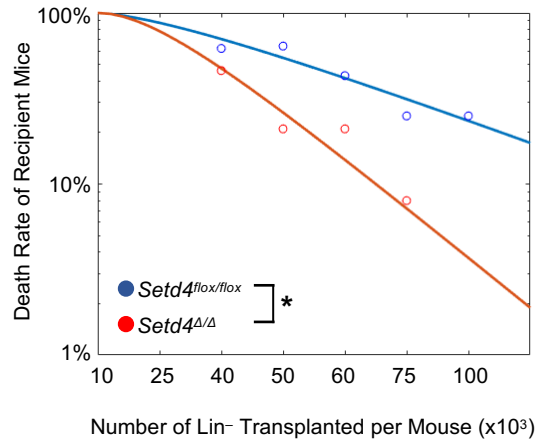

Supplement: Supplementary file [file media-1.pdf]
